# Supplementary material
Source: PubMed Central journal article supplement (PMC3309183)
Supplement: mmc1.pdf [file mmc1.pdf]

The American Journal of Human Genetics, Volume 90

Supplemental Data

**Multicentric Carpotarsal Osteolysis is Caused  
by Mutations Clustering in the Amino-Terminal  
Transcriptional Activation Domain of *MAFB***

Andreas Zankl, Emma L. Duncan, Paul J. Leo, Graeme R. Clark, Evgeny A. Glazov, Marie-Claude Addor, Troels Herlin, Chong Ae Kim, Bruno P. Leheup, Jim McGill, Steven McTaggart, Stephen Mittas, Anna Mitchell, Geert R. Mortier, Stephen P. Robertson, Marie Schroeder, Paulien Terhal, and Matthew A. Brown

Table S1. Summary Statistics for Mapping and Coverage

|                                               | <b>SKDP 1.3</b> | <b>SKDP 15.3</b> | <b>SKDP 20.4</b> | <b>SKDP 28.3</b> | <b>SKDP 8.3</b> | <b>Mean values</b> |
|-----------------------------------------------|-----------------|------------------|------------------|------------------|-----------------|--------------------|
| <b>Total bases</b>                            | 1731677499      | 2279192082       | 2378161980       | 1484849487       | 1957529739      | 1966282157         |
| <b>Total mapped bases</b>                     | 1715783807      | 2263250635       | 2358325193       | 1470261623       | 1906540732      | 1942832398         |
| <b>Bases on target exons (+/-200bp)</b>       | 1506970573      | 1999233622       | 2078292179       | 1255222192       | 1630376221      | 1694018957         |
| <b>Bases on target exons</b>                  | 1049421463      | 1388403439       | 1430071373       | 892412954        | 1143024536      | 1180666753         |
| <b>% bases on target exons (+/- 200bp)</b>    | 87.8            | 88.3             | 88.1             | 85.4             | 85.5            | 87.0               |
| <b>% bases on target exons</b>                | 61.2            | 61.3             | 60.6             | 60.7             | 60.0            | 60.8               |
| <b>Target exon median base coverage</b>       | 31.9            | 45.0             | 46.4             | 29.2             | 36.4            | 37.8               |
| <b>Target exon mean base coverage</b>         | 43.7            | 58.8             | 60.5             | 37.0             | 48.3            | 50.0               |
| <b>Target exon bases with coverage &gt;1</b>  | 98.7            | 98.5             | 98.4             | 98.3             | 98.5            | 98.5               |
| <b>Target exon bases with coverage &gt;5</b>  | 92.4            | 94.0             | 94.3             | 91.9             | 93.6            | 93.2               |
| <b>Target exon bases with coverage &gt;10</b> | 82.1            | 87.4             | 88.0             | 81.6             | 85.4            | 84.9               |
| <b>Target exon bases with coverage &gt;15</b> | 71.8            | 80.0             | 81.0             | 70.6             | 76.3            | 75.9               |

Table S2. Detailed Base Calling Information

Note: these results refer to SNPs/indels that have passed quality and coverage filtering as described.

| Class | Type                 | SKDP 1.3 |       | SKDP 15.3 |       | SKDP 20.4 |       | SKDP 28.3 |       | SKDP 8.3 |       |
|-------|----------------------|----------|-------|-----------|-------|-----------|-------|-----------|-------|----------|-------|
|       |                      | ALL      | Novel | ALL       | Novel | ALL       | Novel | ALL       | Novel | ALL      | Novel |
| snp   | Downstream           | 29       | 0     | 37        | 0     | 54        | 2     | 20        | 0     | 37       | 0     |
|       | Intergenic           | 80       | 0     | 67        | 1     | 84        | 0     | 87        | 3     | 60       | 1     |
|       | Intronic             | 8495     | 96    | 10121     | 93    | 10766     | 71    | 7033      | 104   | 8408     | 114   |
|       | ncRNA                | 591      | 8     | 655       | 5     | 672       | 4     | 498       | 8     | 568      | 4     |
|       | Nonsynonymous        | 5191     | 119   | 5617      | 108   | 5651      | 105   | 5163      | 139   | 5195     | 106   |
|       | Splicing (5bp)       | 373      | 7     | 414       | 5     | 421       | 5     | 371       | 10    | 385      | 12    |
|       | Stop-gain            | 34       | 2     | 46        | 5     | 44        | 1     | 50        | 4     | 44       | 4     |
|       | Stop-loss            | 7        | 0     | 11        | 0     | 10        | 0     | 8         | 0     | 8        | 0     |
|       | Synonymous           | 6744     | 71    | 6875      | 62    | 6973      | 58    | 6366      | 108   | 6495     | 58    |
|       | Unknown              | 0        | 0     | 0         | 0     | 0         | 0     | 0         | 0     | 1        | 0     |
|       | Upstream             | 77       | 0     | 93        | 1     | 105       | 0     | 70        | 2     | 89       | 1     |
|       | Upstream; downstream | 8        | 0     | 14        | 0     | 8         | 0     | 6         | 0     | 8        | 0     |

|              |                      |     |    |     |     |     |     |     |    |     |     |
|--------------|----------------------|-----|----|-----|-----|-----|-----|-----|----|-----|-----|
|              | 3' UTR               | 506 | 6  | 582 | 2   | 632 | 6   | 455 | 5  | 491 | 3   |
|              | 5' UTR               | 363 | 8  | 391 | 8   | 390 | 3   | 311 | 2  | 315 | 4   |
|              | 5' UTR; 3' UTR       | 0   | 0  | 0   | 0   | 0   | 0   | 0   | 0  | 1   | 0   |
| <b>indel</b> | Downstream           | 1   | 0  | 4   | 0   | 4   | 0   | 1   | 0  | 4   | 0   |
|              | Intergenic           | 2   | 0  | 1   | 0   | 3   | 0   | 2   | 0  | 1   | 0   |
|              | Intronic             | 595 | 91 | 720 | 108 | 762 | 108 | 428 | 66 | 619 | 100 |
|              | ncRNA                | 31  | 7  | 32  | 6   | 44  | 11  | 30  | 6  | 38  | 11  |
|              | Splicing (5 bp)      | 28  | 5  | 29  | 4   | 33  | 6   | 21  | 4  | 29  | 7   |
|              | Stop-gain            | 3   | 1  | 2   | 1   | 2   | 1   | 2   | 1  | 3   | 1   |
|              | Stop-loss            | 0   | 0  | 0   | 0   | 1   | 0   | 0   | 0  | 1   | 0   |
|              | Upstream             | 6   | 1  | 5   | 0   | 11  | 1   | 5   | 0  | 6   | 1   |
|              | Upstream; downstream | 1   | 0  | 1   | 0   | 2   | 0   | 0   | 0  | 2   | 1   |
|              | 3' UTR               | 28  | 5  | 39  | 6   | 39  | 7   | 37  | 6  | 29  | 2   |
| 5' UTR       | 14                   | 0   | 21 | 2   | 16  | 0   | 15  | 1   | 15 | 0   |     |
